# Supplementary material for: Dbf4 recruitment by forkhead transcription factors defines an upstream rate-limiting step in determining origin firing timing
Source: PubMed Central journal article supplement — Genes Dev. 2017 Dec 1;31(23-24):2405–15. doi: 10.1101/gad.306571.117 (PMC5795786; doi:10.1101/gad.306571.117), 2017-12-01
Supplement: supp_gad.306571.117_Supplemental_Data.pdf [file supp_gad.306571.117_Supplemental_Data.pdf]

**Dbf4 recruitment by forkhead transcription factors defines an upstream rate-limiting step in determining origin firing timing**

Dingqiang Fang<sup>1,#</sup>, Armelle Lengronne<sup>2,#</sup>, Di Shi<sup>1,#</sup>, Romain Forey<sup>2</sup>, Magdalena Skrzypczak<sup>3</sup>, Krzysztof Ginalski<sup>3</sup>, Changhui Yan<sup>4</sup>, Xiaoke Wang<sup>1</sup>, Qinhong Cao<sup>1</sup>, Philippe Pasero<sup>2,\*</sup>, Huiqiang Lou<sup>1,\*</sup>

Supplemental information contains Tables S1-S2 and Figures S1-S4.

**Table S1. Strains used in this study**

| Strain  | Genotype                                                             | Usage          |
|---------|----------------------------------------------------------------------|----------------|
| W303-1a | <i>MATa trp1-1 ura3-1 his3-11,15 leu2-3,112 ade2-1 can1-100 RAD5</i> | WT             |
| DF110   | W303 <i>DBF4-13MYC::TRP1</i>                                         | Fig. 1B        |
| DF111   | W303 <i>FKH1-3HA::KanMX6</i>                                         | Fig. 1B        |
| DF112   | W303 <i>DBF4-13MYC::TRP1 FKH1-3HA::KanMX6</i>                        | Fig. 1B        |
| DF136   | W303 <i>ORC2-3HA::KanMX6 fkh1Δ::NatMX</i>                            | Fig. 1E        |
| DF138   | W303 <i>MCM2-3HA::HIS3 fkh1Δ::NatMX</i>                              | Fig. 1E        |
| DF201   | W303 <i>6HA-DBF4</i>                                                 | Fig. 1D        |
| DF202   | W303 <i>6HA-DBF4 fkh1Δ::NatMX</i>                                    | Fig. 1D        |
| DF203   | W303 <i>6HA-DBF4 fkh1Δ::NatMX fkh2ΔC::HIS3</i>                       | Fig. 1D        |
| DF172   | W303 <i>SLD3-13MYC::HIS3</i>                                         | Fig. 5C        |
| DF173   | W303 <i>SLD3-13MYC::HIS3 fkh1Δ::NatMX</i>                            | Fig. 5C        |
| DF174   | W303 <i>SLD3-13MYC::HIS3 fkh1Δ::NatMX fkh2ΔC::HIS3</i>               | Fig. 5C, 2F    |
| DF185   | W303 <i>DBF4-5FLAG::KanMX6</i>                                       | Fig. 1C        |
| DF186   | W303 <i>FKH1-13MYC::HIS3</i>                                         | Fig. 1C, 2B    |
| DF187   | W303 <i>KanMX6::DBF4-5FLAG HIS3::FKH1-13MYC</i>                      | Fig. 1C, 2B    |
| DF301   | W303 <i>dbf4ΔC(656-704)::LEU2</i>                                    | Fig. 2F, 3C    |
| DF302   | W303 <i>fkh1Δ::NatMX dbf4ΔC(656-704)-forkhead::LEU2</i>              | Fig. 3D        |
| DF304   | W303 <i>dbf4ΔC(656-704)-forkhead::LEU2</i>                           | Fig. 3C        |
| DF305   | W303 <i>dbf4ΔC(656-704)-forkhead*::LEU2</i>                          | Fig. 3C        |
| DS1     | W303 <i>fkh1Δ::NatMX</i>                                             | Fig. 2F, 3D, 4 |
| DS6     | W303 <i>fkh1Δ::NatMX DBF4-forkhead::LEU2</i>                         | Fig. 4         |
| DS8     | W303 <i>fkh1Δ:: NatMX DBF4-forkhead*::KanMX</i>                      | Fig. 4         |
| DS13    | W303 <i>DBF4-GST::KanMX</i>                                          | Fig. 4         |

**Table S2. Plasmids used in this study**

| <b>Plasmid</b>            | <b>Base plasmid/Genotype</b>                  | <b>Usage</b>        |
|---------------------------|-----------------------------------------------|---------------------|
| pET28a-DBF4               | kan <sup>r</sup> 6His-DBF4                    | Fig. 1H             |
| pET28a-dbf4C              | kan <sup>r</sup> 6His-dbf4(656-704)           | Fig. 2E             |
| pGEX-4T-1-DBF4            | amp <sup>r</sup> GST-DBF4                     | Fig. 5B             |
| pGEX-4T-1-DBF4N           | amp <sup>r</sup> GST-dbf4(1-390)              | Fig. 5B             |
| pGEX-4T-1-FKH1            | amp <sup>r</sup> GST-FKH1                     | Fig. 1G, 1H, 2E, 3A |
| pGEX-4T-1-fkh1(forkhead*) | amp <sup>r</sup> GST-fkh1 $\Delta$ (NXXRHXXS) | Fig. 3A             |
| pGADT7-FKH1               | amp <sup>r</sup> /LEU2 GAL4-AD-FKH1           | Fig. 1A, 2A, 2D     |
| pGADT7-FKH2               | amp <sup>r</sup> /LEU2 GAL4-AD-FKH2           | Fig. 1A             |
| pGADT7-CDC7               | amp <sup>r</sup> /LEU2 GAL4-AD-CDC7           | Fig. 1A, 2D         |
| pGBKT7-DBF4               | kan <sup>r</sup> /TRP1 GAL4-BD-DBF4           | Fig. 1A, 2A, 5A     |
| pGBKT7-dbf4(67-704)       | kan <sup>r</sup> /TRP1 GAL4-BD-dbf4(67-704)   | Fig. 2D             |
| pGBKT7-dbf4(1-655)        | kan <sup>r</sup> /TRP1 GAL4-BD-dbf4(1-655)    | Fig. 2D             |
| pGBKT7-dbf4(656-704)      | kan <sup>r</sup> /TRP1 GAL4-BD-dbf4(656-704)  | Fig. 2D             |
| pGBKT7-dbf4(1-680)        | kan <sup>r</sup> /TRP1 GAL4-BD-dbf4(1-680)    | Fig. 2D             |
| pGBKT7-SLD3               | kan <sup>r</sup> /TRP1 GAL4-BD-SLD3           | Fig. 1A, 5A         |
| pGBKT7-SLD7               | kan <sup>r</sup> /TRP1 GAL4-BD-SLD7           | Fig. 1A             |
| pGBKT7-CDC45              | kan <sup>r</sup> /TRP1 GAL4-BD-CDC45          | Fig. 1A, 5A         |
| pGADT7-SLD3               | amp <sup>r</sup> /LEU2 GAL4-AD-SLD3           | Fig. 1A             |
| pGADT7-fkh1-R80A          | amp <sup>r</sup> /LEU2 GAL4-AD- fkh1-R80A     | Fig. 2A             |
| pGADT7-fkh1N              | amp <sup>r</sup> /LEU2 GAL4-AD- fkh1N         | Fig. 2A             |
| pGADT7-fkh1N-R80A         | amp <sup>r</sup> /LEU2 GAL4-AD- fkh1N-R80A    | Fig. 2A             |
| pGADT7-fkh1N-R80A         | amp <sup>r</sup> /LEU2 GAL4-AD- fkh1N-R80A    | Fig. 2A             |
| pGADT7-fkh1C              | amp <sup>r</sup> /LEU2 GAL4-AD- fkh1C         | Fig. 2A             |
| pET28a-SLD3               | kan <sup>r</sup> 6His-SLD3                    | Fig. 5B             |

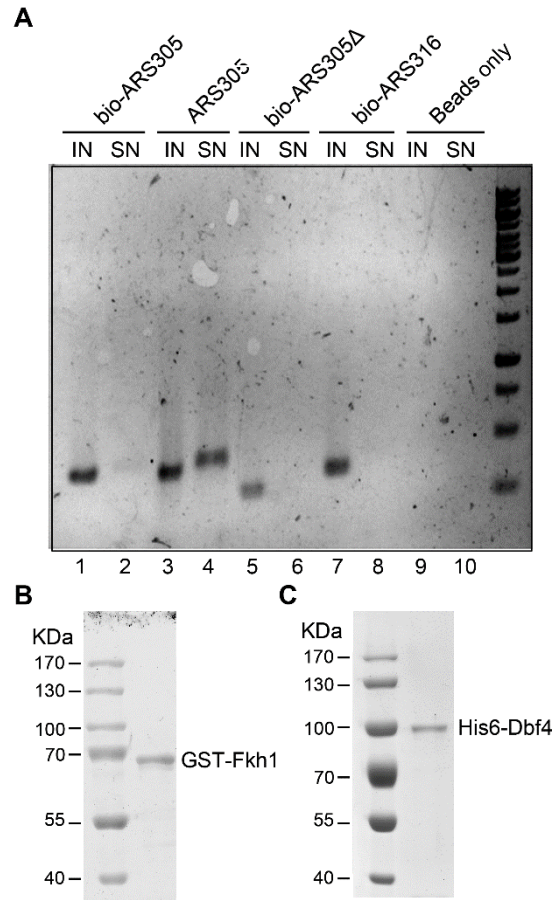

### Figure S1

(A) Related to Figure 1F-H. Biotin-labeled *ARS* DNA is efficiently immobilized to the streptavidin beads. Unbound DNA (supernatant, SN) was analyzed by a 2% agarose gel after incubation with the streptavidin beads. The same volume of input DNA (IN) was loaded as a control.

(B, C) Related to Figure 1G-H. SDS-PAGE analysis of purified recombinant proteins Fkh1 (B) and Dbf4 (C). GST-Fkh1 and His6-Dbf4 were expressed and purified following the handbook of the manufacturer.

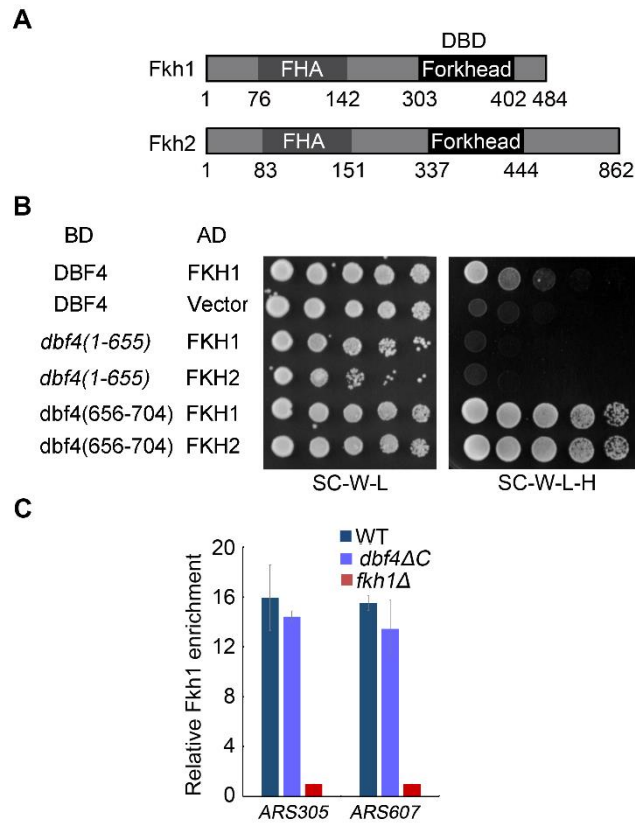

**Figure S2- Related to Figure 2.**

(A) Domain organizations of Fkh1 and Fkh2. Dark and light grey bars indicate high to moderate sequence identity between them. DBD: DNA binding domain.

(B) C-terminus of Dbf4 mediates interaction with Fkh1/2. Yeast two hybrids were carried out as in Figure 2A. 5-fold serial dilutions of the yeast cells expressing the indicated plasmids were grown at 30 °C on either SC-W-L or SC-W-L-H plates.

(C) Fkh1 persists in binding to early origins in the absence of Dbf4 C-terminus. Fkh1 protein was immunoprecipitated via rabbit multi-clonal antibodies against Fkh1 raised in this study. ChIP assays were conducted basically as described in Figure 1D.

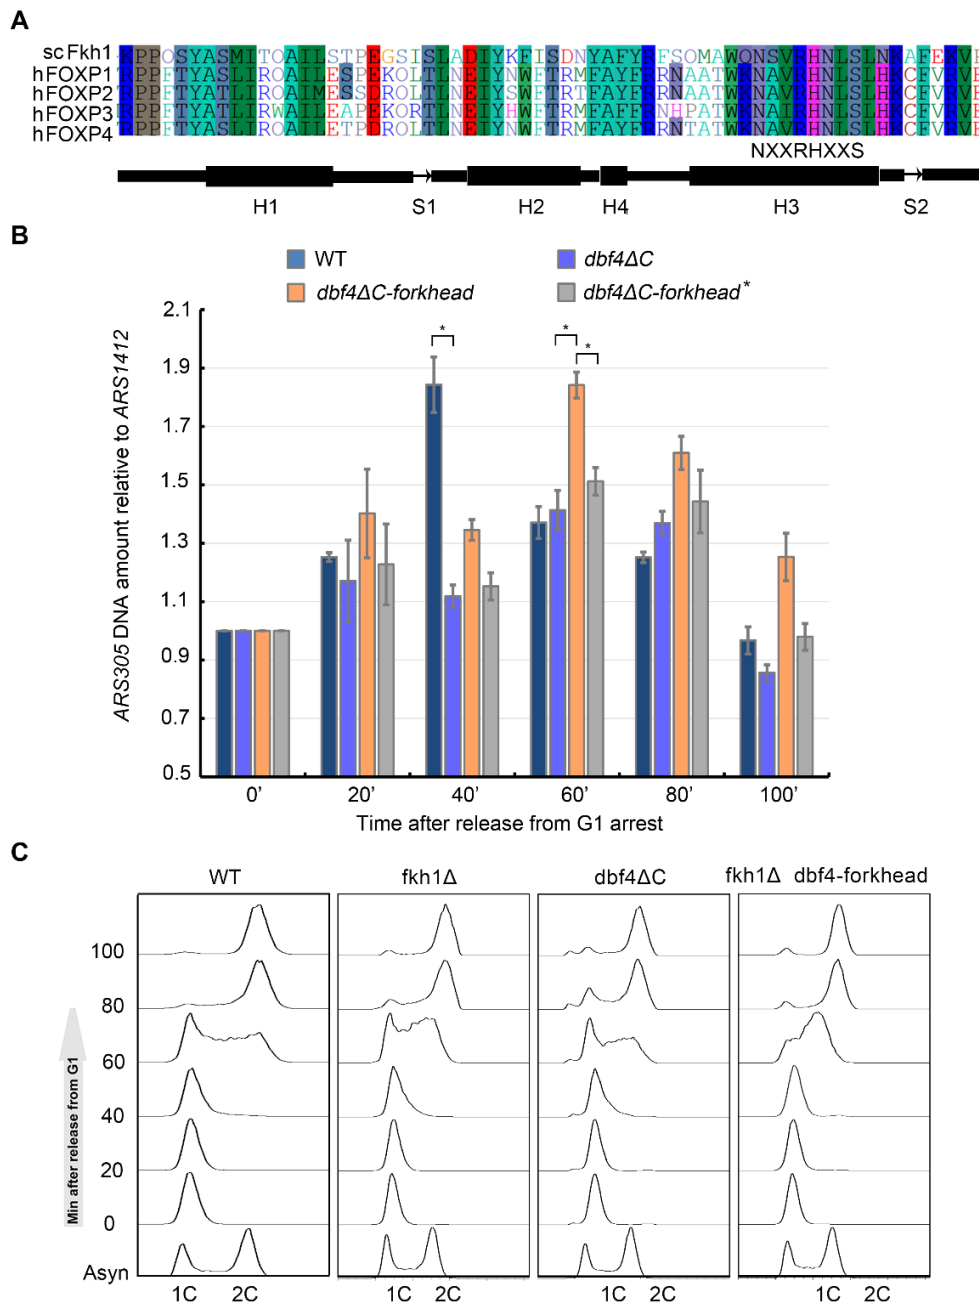

**Figure S3- Related to Figure 3.**

(A) Amino acid sequence alignment of the forkhead domain of yeast Fkh1 and human forkhead box transcription factors. A conserved motif NxxRHxxS required for DNA binding is indicated.

(B) The deficiency of ARS305 firing can be mostly overcome by fusing Dbf4ΔC with the forkhead domain, but not with the forkhead\* mutant. The copy number assays were performed as described in Figure 3C. An average was calculated from three independent experiments; error bars represent SDs. P-value < 0.05 is denoted as “\*”.

(C) Representative flow cytometry profiles of cells used for the copy number assays in Figures 3C and 3D. Cells were synchronized by  $\alpha$ -factor and released into fresh media for the indicated time.

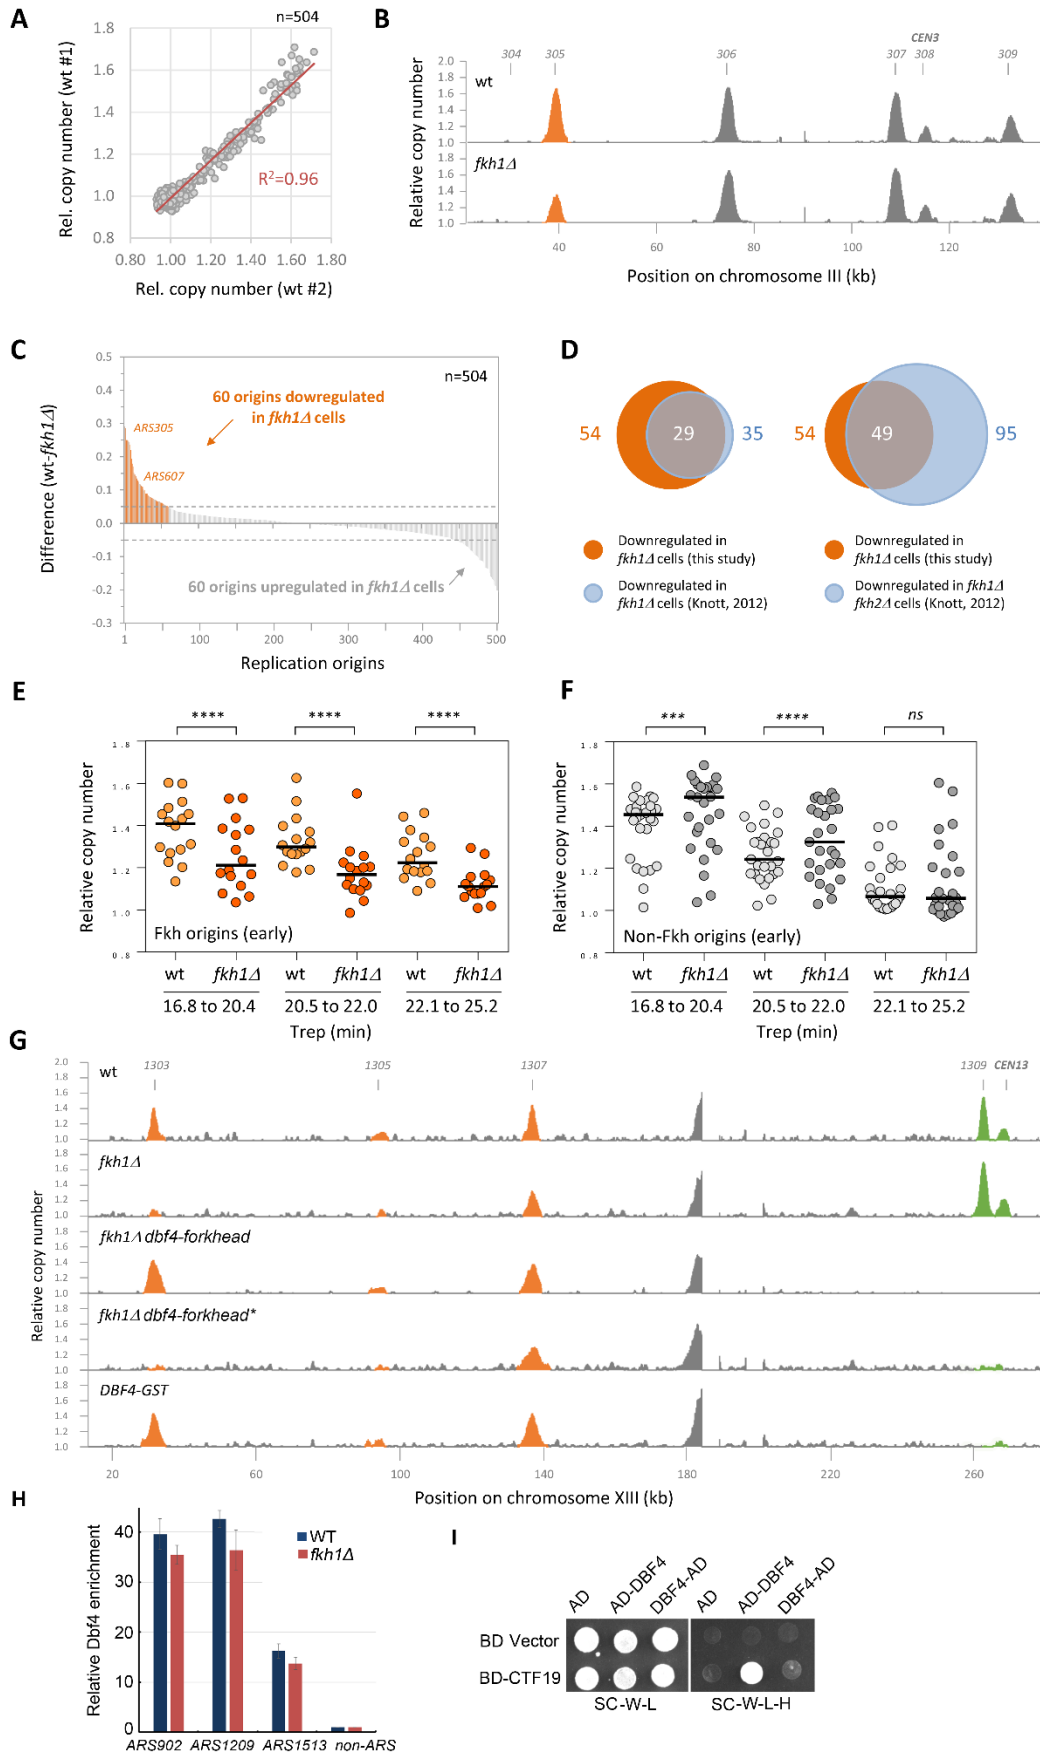

**Figure S4- Related to Figure 4. Genome-wide analysis of origin usage in WT and in *fkh1Δ* cells**

(A) Comparison of the relative copy number around replication origins (n=504) in two biological replicates of WT cells.

(B) Representative region on chromosome III showing the activity of Fkh1-dependent (orange) and Fkh1-independent (grey) origins in WT and *fkh1Δ* cells.

(C) Difference in relative copy number between WT and *fkh1Δ* cells as calculated for 504 annotated origins. 60 origins showing a difference larger than 0.05 (10% of max difference) between WT and *fkh1Δ* cells are labeled in orange.

(D) Venn diagrams of the overlap between 54 origins downregulated in *fkh1Δ* cells (overlap of two biological replicates; this study) and origins downregulated in *fkh1Δ* cells or *fkh1Δ fkh2ΔC* cells (Knott et al. 2012).

(E) Relative copy number at Fkh1-dependent origins in WT and *fkh1Δ* cells, sorted in three groups depending on their time of replication (Trep).

(F) Relative copy number at Fkh1-independent origins in WT and *fkh1Δ* cells, sorted in three groups depending on their time of replication (Trep). \*\*\*\*:  $p < 0.0001$ , ns: non-significant, Wilcoxon matched-pairs signed rank test.

(G) Representative regions on chromosome XIII showing the activity of Fkh1-dependent (orange) and *CEN* origins (green) in WT, *fkh1Δ*, *fkh1Δ DBF4-forkhead*, *fkh1Δ DBF4-forkhead\** and *DBF4-GST* cells.

(H) Fkh1 does not significantly affect Dbf4 recruitment to *CEN* origins. HA6-Dbf4 was immunoprecipitated via a monoclonal antibody against HA and ChIP was performed as described in Figure 1D.

(I) C-terminal tagging of Dbf4 abolishes the interaction with Ctf19. Yeast two hybrid was basically conducted as described in Figure 1A.

**Supplemental References**

1. Knott SR, Peace JM, Ostrow AZ, Gan Y, Rex AE, Viggiani CJ, Tavare S, Aparicio OM. Forkhead transcription factors establish origin timing and long-range clustering in *S. cerevisiae*. *Cell* 2012; 148:99-111.
